# Supplementary material
Source: PubMed Central journal article supplement (PMC5602380)

## The cardiac z-disc protein CEFIP regulates cardiomyocyte hypertrophy by modulating of calcineurin signaling

Franziska Dierck<sup>1,#</sup>, Christian Kuhn<sup>1,#</sup>, Claudia Rohr<sup>2</sup>, Susanne Hille<sup>1,#</sup>, Julia Braune<sup>3</sup>, Samuel Sossalla<sup>1,#</sup>, Sibylle Molt<sup>3</sup>, Peter F.M. van der Ven<sup>3</sup>, Dieter O. Fürst<sup>3</sup>, and Norbert Frey<sup>1,#,\*</sup>

<sup>1</sup> Department of Internal Medicine III, University Medical Center Schleswig-Holstein, Campus Kiel, D-24105, Germany. <sup>2</sup> Department of Internal Medicine III, University of Heidelberg, D-69120 Heidelberg, Germany. <sup>3</sup> Department of Molecular Cell Biology, Institute for Cell Biology, University of Bonn, D-53121 Bonn, Germany. # Co-affiliated with DZHK (German Centre for Cardiovascular Research), partner site Hamburg/Kiel/Lübeck, Germany

### LEGENDS FOR SUPPLEMENTARY MOVIE

**Supplementary movie S1-** FRAP analysis of CEFIP dynamics in z-discs of cultured myotubes expressing EGFP-tagged CEFIP using a Cell Observer Spinning Disk Confocal Microscope (Carl Zeiss, Jena, Germany) equipped with an external 473 nm laser coupled via a scanner (UGA-40, Rapp OptoElectronic, Hamburg, Germany). (00:00:00 indicates hours:minutes:seconds).

### LEGENDS FOR SUPPLEMENTARY FIGURES

**Supplementary Figure 1:** Alignment of CEFIP protein sequences from different mammalian species (*Homo sapiens*, *Mus musculus*, *Rattus norvegicus*, *Macaca mulatta*, *Canis lupus*, and *Bos taurus*) illustrates the high conservation among these species.

**Supplementary Figure 2:** Immunostaining of neonatal rat cardiomyocytes (NRVCM), adult rat ventricular cardiomyocytes (ARVCM) and intact mouse heart tissue with a specific CEFIP antibody reveals a strong signal at the sarcomeric z-disc (**A-C**). DAPI was used for nuclear staining. Immunostaining of intact mouse kidney and liver tissue (**D-E**) with CEFIP antibody does not show a signal. Scale bar 20µm

# Supplementary Figure 1

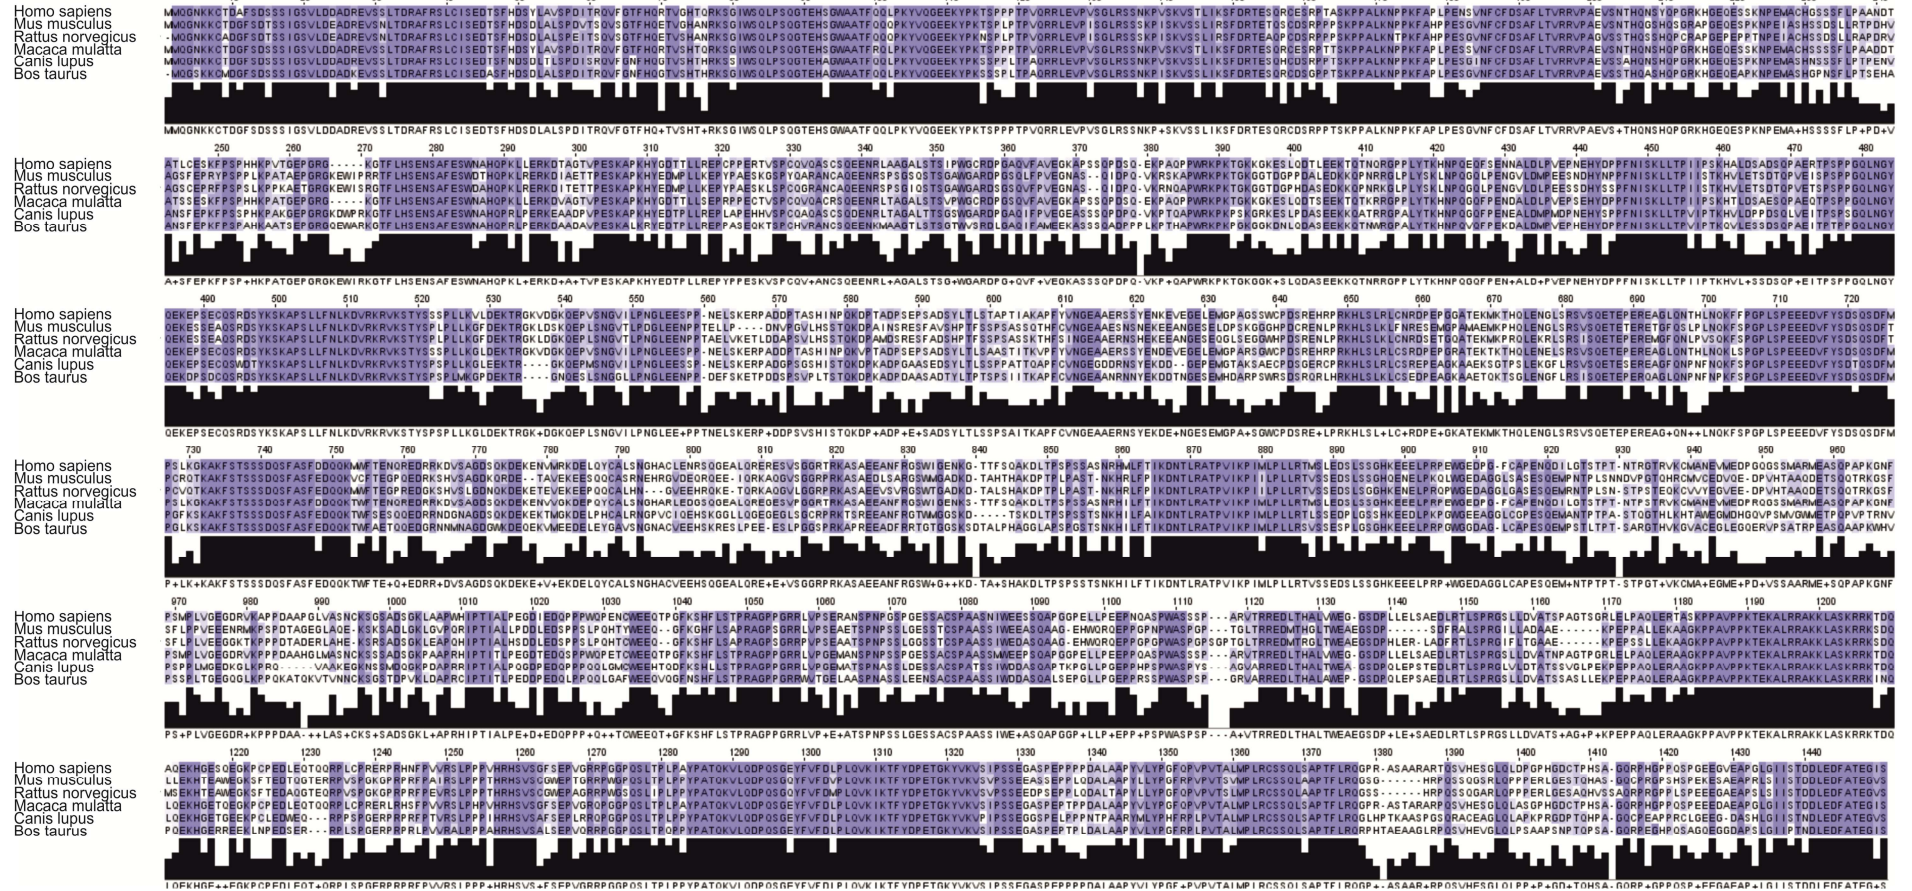

Supplementary Figure 2

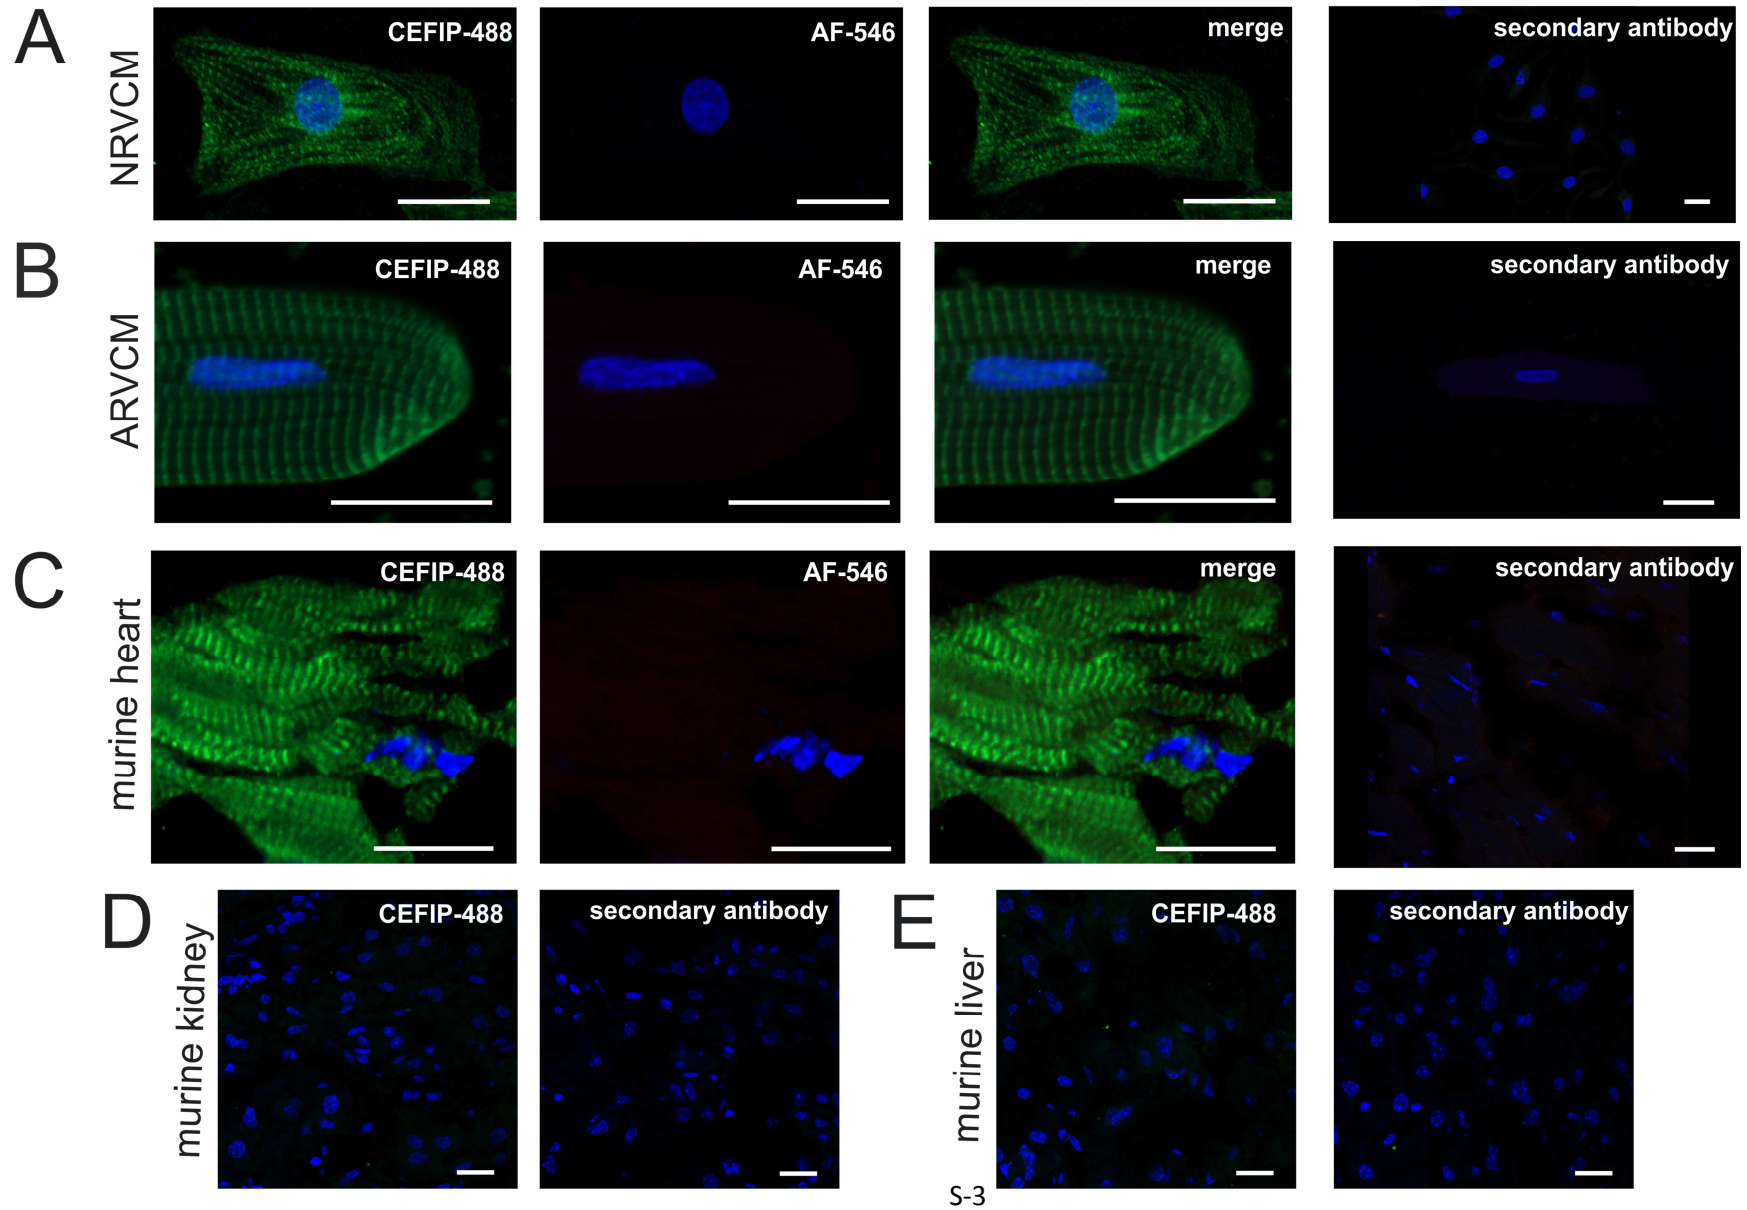

Supplement: 10.1074_M117.786764_jbc.M117.786764-1.pdf [file 10.1074_M117.786764_jbc.M117.786764-1.pdf]
